# Supplementary material for: Apramycin kills replicating and non-replicating Mycobacterium tuberculosis
Source: Frontiers journal article supplement (doi:10.3389/fitd.2024.1413211), 2024-08-20
Supplement: Table_1.docx [file Table_1.docx]

**SUPPLEMENTARY Tables:**

**Table S1: List of *Mycobacterium tuberculosis* strains used**

| **S.N.** | **Mtb Strains** | **Resistance Profile** | |
| --- | --- | --- | --- |
| 1 | Mtb H37Rv | Drug-Sensitive (WT) | Sensitive |
| 2 | 11291 | Drug-Sensitive | Sensitive |
| 3 | 11178 | DDR | INH, RIF |
| **4** | 8531 | DDR | OFX, AMI |
| **5** | 7524 | DDR | INH, AMI |
| **6** | 11138 | MDR | INH, RIF, THZ |
| **7** | 11236 | MDR | STR, INH, THZ |
| **8** | 11033 | MDR | STR, RIF, THZ |
| **9** | 10899 | MDR | INH, RIF, EMB, AMI |
| **10** | 8673 | MDR | INH, RIF, AMI, THZ |
| **11** | 9394 | MDR | INH, OFX, AMI, THZ |

A variety of Mtb strains belonging to different drug-resistance profiles were used for testing the activity of Apramycin.
