# Supplementary material for: Apramycin kills replicating and non-replicating Mycobacterium tuberculosis
Source: Frontiers journal article supplement (doi:10.3389/fitd.2024.1413211), 2024-08-20
Supplement: Table_2.docx [file Table_2.docx]

**Table S2: Activity of APR against Mtb Biofilm**

|  | | **Mtb ATCC 27294** | | | |
| --- | --- | --- | --- | --- | --- |
| **SN** | **Compounds tested** | **Mtb MIC (µg/mL)** | **X MIC** | **Conc. (µg/mL)** | **Cfu drop (log10 cfu/ml) in Biofilm** |
| 1 | Apramycin | 1 | 64X | 64 | **1.07** |
| 16X | 16 | 0.37 |
| 4X | 4 | -0.39 |
| 1X | 1 | -0.50 |
| 2 | Amikacin | 0.5 | 64X | 32 | **0.28** |
| 16X | 8 | 0.06 |
| 4X | 2 | -0.41 |
| 1X | 0.5 | -0.56 |
| 3 | Moxifloxacin | 0.06 | 64X | 4 | **0.76** |
| 16X | 1 | -0.02 |
| 4X | 0.25 | -0.49 |
| 1X | 0.0625 | -0.63 |
| 4 | Isoniazid | 0.06 | 64X | 4 | **-0.09** |
| 16X | 1 | -0.27 |
| 4X | 0.25 | -0.39 |
| 1X | 0.0625 | -0.49 |
| 5 | Rifampicin | 0.008 | 64X | 0.5 | **0.67** |
| 16X | 0.125 | 0.18 |
| 4X | 0.03125 | -0.38 |
| 1X | 0.007813 | -0.67 |
| 6 | Ethambutol | 1 | 64X | 64 | **0.28** |
| 16X | 16 | -0.04 |
| 4X | 4 | -0.38 |
| 1X | 1 | -0.45 |

|  | | **Mtb ATCC 27294** | | | |
| --- | --- | --- | --- | --- | --- |
| **SN** | **Compounds tested** | **Mtb MIC (µg/mL)** | **X MIC** | **Conc. (µg/mL)** | **Cfu drop (log10 cfu/ml) in Biofilm** |
| 1 | Apramycin | 1 | 64X | 64 | **1.02** |
| 16X | 16 | 0.41 |
| 4X | 4 | -0.36 |
| 1X | 1 | -0.57 |
| 2 | Amikacin | 0.5 | 64X | 32 | **0.20** |
| 16X | 8 | -0.21 |
| 4X | 2 | -0.35 |
| 1X | 0.5 | -0.51 |
| 3 | Bedaquiline | 0.125 | 64X | 8 | **0.73** |
| 16X | 2 | 0.00 |
| 4X | 0.5 | -0.31 |
| 1X | 0.125 | -0.48 |
| 4 | Pretomanid | 0.25 | 64X | 16 | **0.22** |
| 16X | 4 | 0.04 |
| 4X | 1 | -0.21 |
| 1X | 0.25 | -0.30 |
| 5 | Linezolid | 0.5 | 64X | 32 | **0.42** |
| 16X | 8 | -0.21 |
| 4X | 2 | -0.35 |
| 1X | 0.5 | -0.52 |
| 6 | Moxifloxacin | 0.06 | 64X | 4 | **0.65** |
| 16X | 1 | -0.01 |
| 4X | 0.25 | -0.29 |
| 1X | 0.0625 | -0.41 |

Apramycin is active against the Mtb Biofilm. The activity of Apramycin is slightly higher (~ 1µg/ml) against Mtb in the biofilm phase. AMI did not show good activity against Mtb biofilm.
