# Supplementary material for: Apramycin kills replicating and non-replicating Mycobacterium tuberculosis
Source: Frontiers journal article supplement (doi:10.3389/fitd.2024.1413211), 2024-08-20
Supplement: Table_3.docx [file Table_3.docx]

**Table S3: Cytotoxicity of APR against 3 different cell lines**

|  |  | | | |  |
| --- | --- | --- | --- | --- | --- |
| **SN** | **Sample ID** | **Highest conc. tested (µg/ml)** | **THP-1** | **HepG2** | **A549** |
| **Cytotoxic conc. (µg/ml)** | | |
| **1** | Apramycin (APR) | 256 | >256 | >256 | >256 |
| **2** | Amikacin | 64 | >64 | >64 | >64 |
| **3** | Moxifloxacin | 64 | >64 | >64 | >64 |
| **QC** | Rifampicin | 64 | >64 | >64 | >64 |
| Menadione | 128 | 8 | 8 | 8 |

APR or any of the other reference drugs tested (AMI, MOX, and RIF) did not show any cytotoxicity against any of the three different cell lines tested (>256 µg/mL, and the other drugs AMI,MOX, and RIF >64 µg/mL). Menadione was used as a cytotoxicity-positive drug control and it showed cytotoxicity (4-8µg/ml).
